# Supplementary material
Source: PubMed Central journal article supplement (PMC9134037)
Supplement: jamacardiol-e221166-s001.pdf [file jamacardiol-e221166-s001.pdf]

## Supplemental Online Content

Bahit MC, Vora AN, Li Z, et al. Apixaban or warfarin and aspirin or placebo after acute coronary syndrome or percutaneous coronary intervention in patients with atrial fibrillation and prior stroke: a post hoc analysis from the AUGUSTUS trial. *JAMA Cardiol*. Published online May 25, 2022. doi:10.1001/jamacardio.2022.1166

**eFigure 1.** Kaplan-Meier curves for ISTH major or CRNM bleeding in patients with (A) and without (B) prior stroke/TIA/TE

**eFigure 2.** Kaplan-Meier curves for death or hospitalization in patients with (A) and without (B) prior stroke/TIA/TE

**eFigure 3.** Kaplan-Meier curves for death or ischemic events in patients with (A) and without (B) prior stroke/TIA/TE

This supplemental material has been provided by the authors to give readers additional information about their work.

**Figure 1A. Kaplan-Meier curves for ISTH major or CRNM bleeding in patients with prior stroke/TIA/TE**

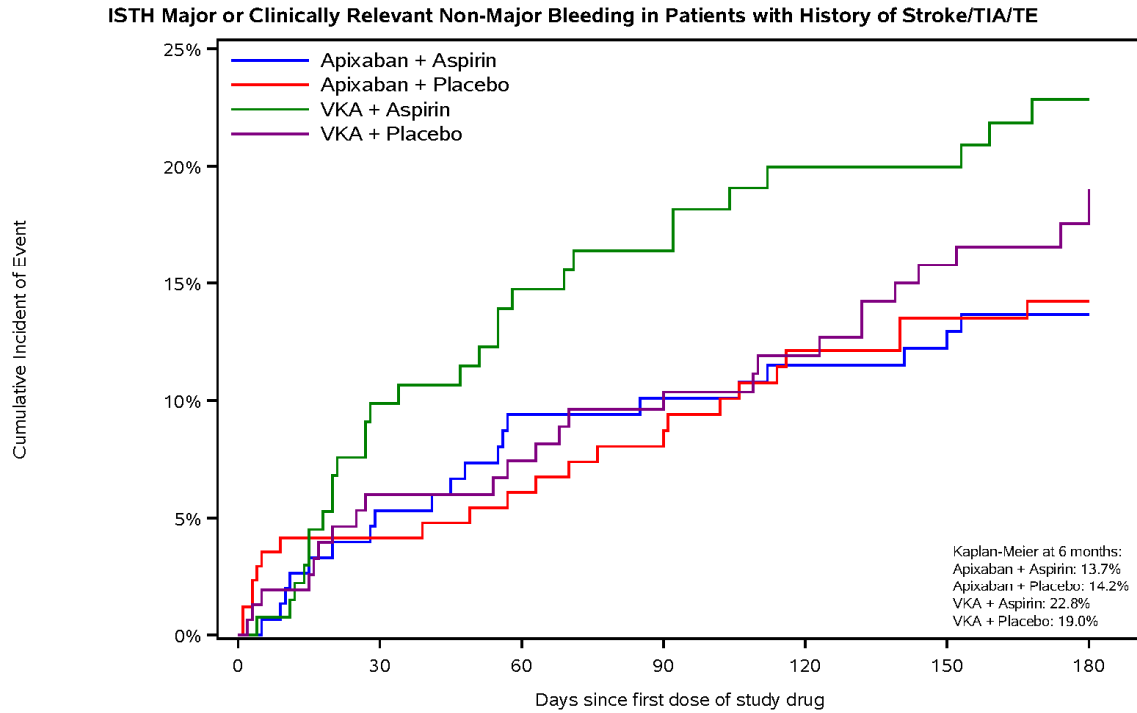

|                    | 0   | 30  | 60  | 90  | 120 | 150 | 180 |
|--------------------|-----|-----|-----|-----|-----|-----|-----|
| Apixaban + Aspirin | 153 | 141 | 133 | 129 | 125 | 123 | 130 |
| Apixaban + Placebo | 170 | 152 | 145 | 136 | 128 | 125 | 152 |
| VKA + Aspirin      | 136 | 116 | 104 | 95  | 89  | 86  | 104 |
| VKA + Placebo      | 158 | 137 | 129 | 121 | 114 | 109 | 57  |

**Figure 1B. Kaplan-Meier curves for ISTH major or CRNM bleeding in patients with no prior stroke/TIA/TE**

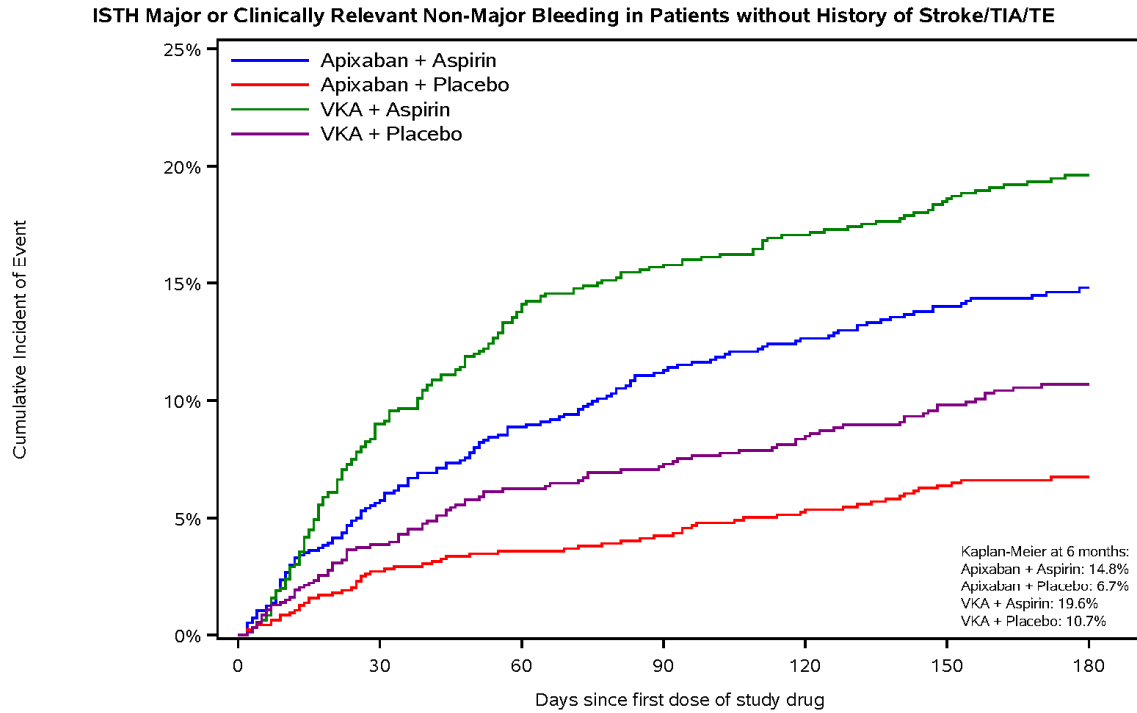

|                    | Number at Risk |     |     |     |     |     |     |
|--------------------|----------------|-----|-----|-----|-----|-----|-----|
| Apixaban + Aspirin | 983            | 887 | 834 | 800 | 771 | 751 | 836 |
| Apixaban + Placebo | 966            | 916 | 894 | 866 | 843 | 818 | 914 |
| VKA + Aspirin      | 981            | 841 | 772 | 738 | 706 | 685 | 824 |
| VKA + Placebo      | 961            | 866 | 815 | 793 | 766 | 740 | 942 |

**Figure 2A. Kaplan-Meier curves for death or hospitalization in patients with prior stroke/TIA/TE**

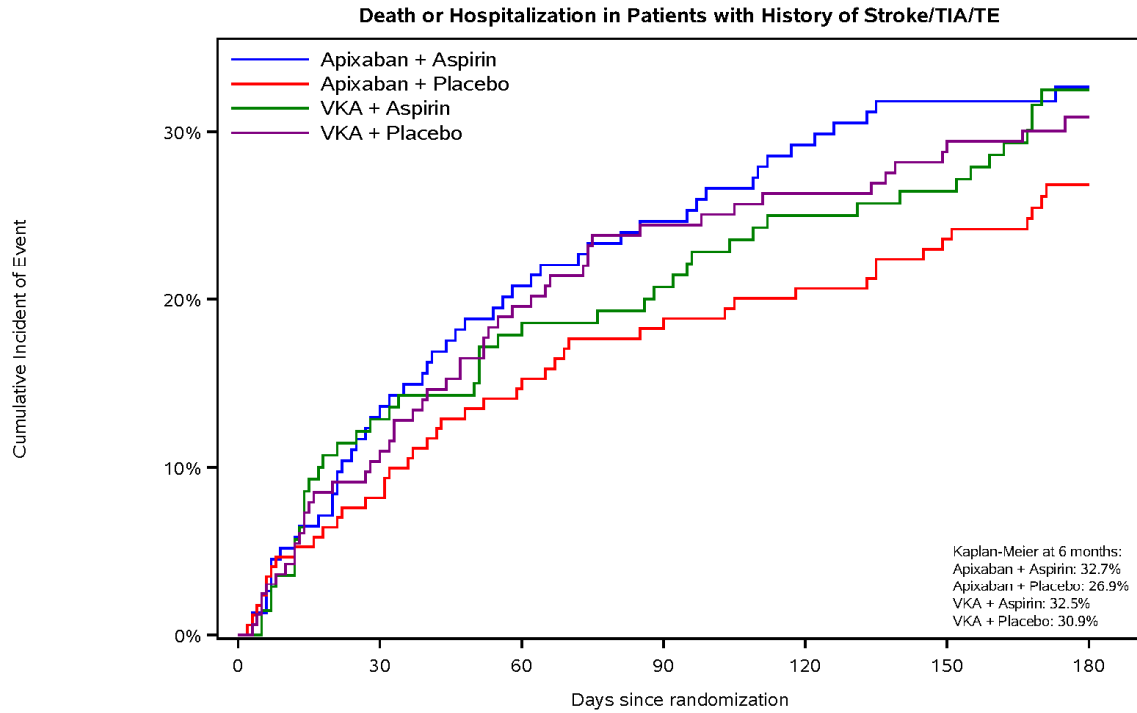

|                    | Number at Risk |     |     |     |     |     |     |
|--------------------|----------------|-----|-----|-----|-----|-----|-----|
| Apixaban + Aspirin | 155            | 134 | 122 | 116 | 109 | 105 | 108 |
| Apixaban + Placebo | 171            | 157 | 144 | 137 | 133 | 128 | 138 |
| VKA + Aspirin      | 142            | 122 | 115 | 111 | 104 | 102 | 114 |
| VKA + Placebo      | 165            | 147 | 131 | 122 | 119 | 115 | 136 |

**Figure 2B. Kaplan-Meier curves for death or hospitalization in patients with no prior stroke/TIA/TE**

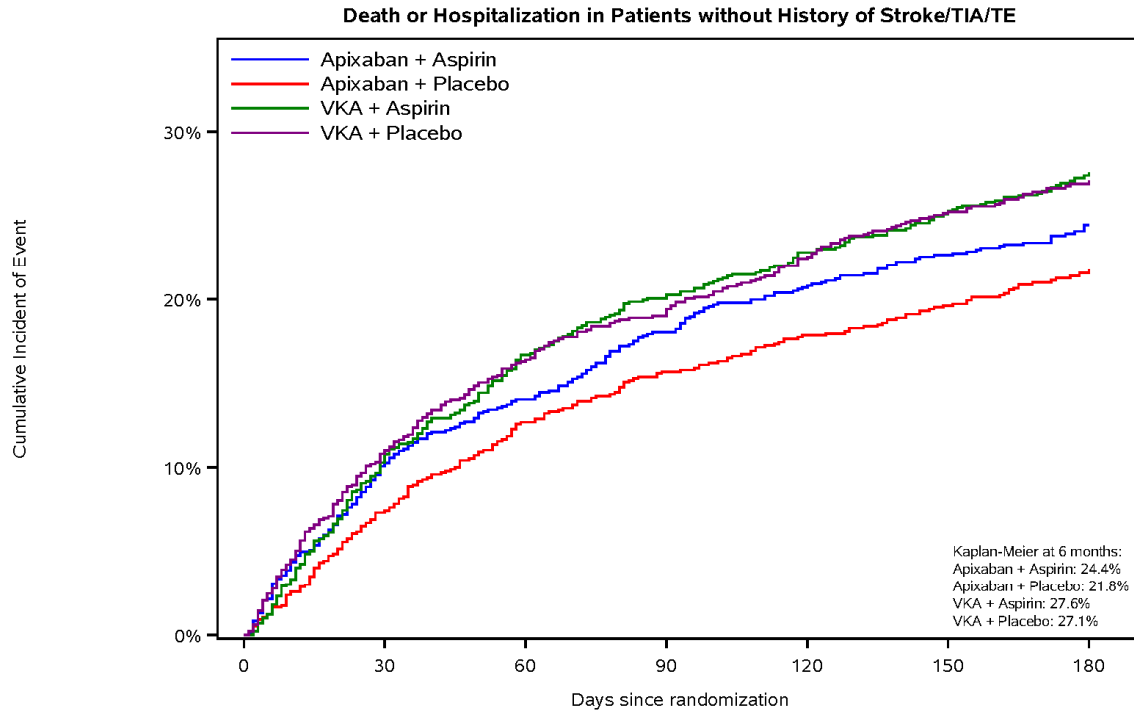

|                    | Number at Risk |     |     |     |     |     |     |
|--------------------|----------------|-----|-----|-----|-----|-----|-----|
| Apixaban + Aspirin | 988            | 884 | 840 | 799 | 771 | 750 | 806 |
| Apixaban + Placebo | 975            | 900 | 845 | 815 | 794 | 775 | 415 |
| VKA + Aspirin      | 1004           | 887 | 817 | 781 | 753 | 727 | 430 |
| VKA + Placebo      | 981            | 865 | 808 | 778 | 744 | 718 | 439 |

**Figure 3A. Kaplan-Meier curves for death or ischemic events in patients with prior stroke/TIA/TE**

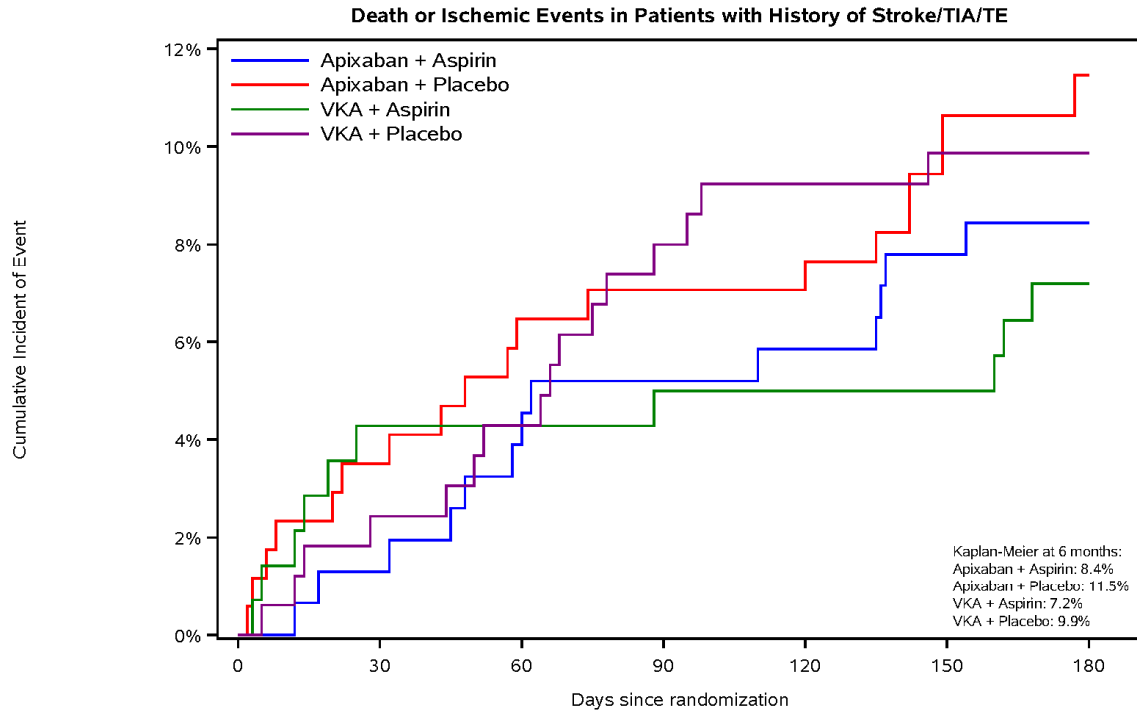

|                    | 0   | 30  | 60  | 90  | 120 | 150 | 180 |
|--------------------|-----|-----|-----|-----|-----|-----|-----|
| Apixaban + Aspirin | 155 | 152 | 148 | 146 | 145 | 142 | 154 |
| Apixaban + Placebo | 171 | 165 | 158 | 156 | 156 | 150 | 168 |
| VKA + Aspirin      | 142 | 134 | 134 | 133 | 132 | 132 | 160 |
| VKA + Placebo      | 165 | 160 | 155 | 148 | 146 | 145 | 174 |

**Figure 3B. Kaplan-Meier curves for death or ischemic events in patients with no prior stroke/TIA/TE**

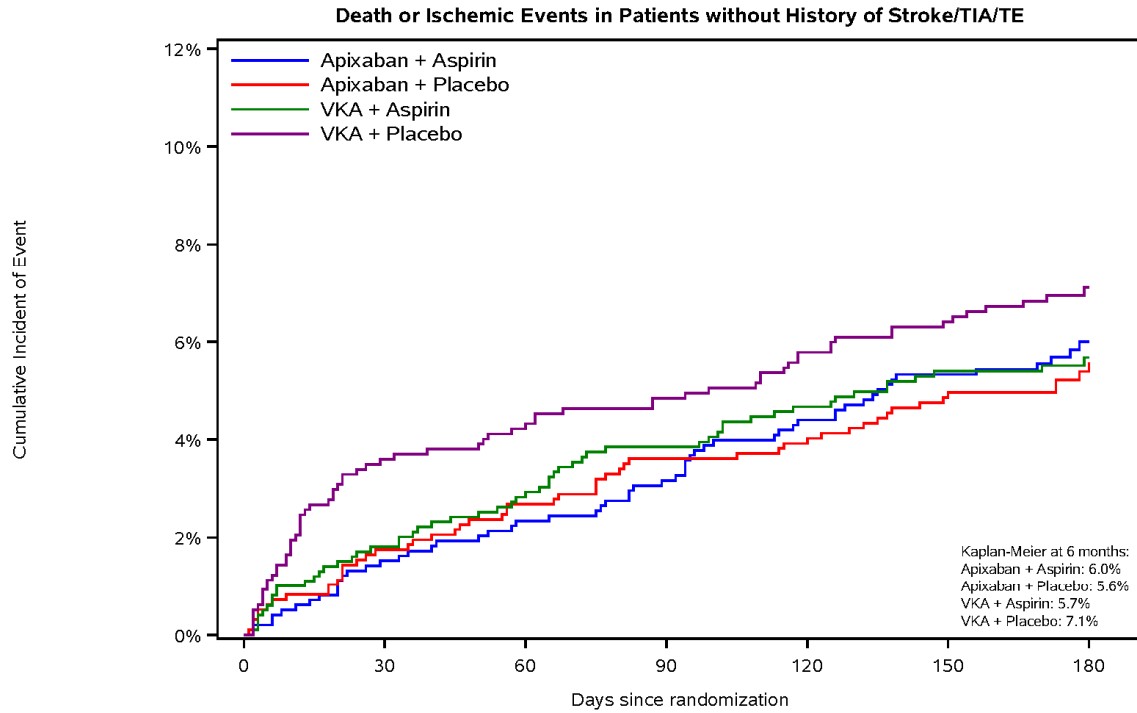

|                    | Number at Risk |     |     |     |     |     |      |
|--------------------|----------------|-----|-----|-----|-----|-----|------|
|                    | 0              | 30  | 60  | 90  | 120 | 150 | 180  |
| Apixaban + Aspirin | 988            | 968 | 952 | 941 | 927 | 914 | 1010 |
| Apixaban + Placebo | 975            | 954 | 941 | 931 | 927 | 917 | 507  |
| VKA + Aspirin      | 1004           | 971 | 952 | 938 | 927 | 915 | 1108 |
| VKA + Placebo      | 981            | 936 | 925 | 915 | 905 | 898 | 1112 |
