# Supplementary material
Source: PubMed Central journal article supplement (PMC9134037)
Supplement: jamacardiol-e221166-s002.pdf [file jamacardiol-e221166-s002.pdf]

## **Data Sharing Statement**

Bahit. Apixaban or Warfarin and Aspirin or Placebo After Acute Coronary Syndrome or Percutaneous Coronary Intervention in Patients With Atrial Fibrillation and Prior Stroke. *JAMA Cardiol.* Published May 25, 2022. doi:10.1001/jamacardio.2022.1166

### **Data**

**Data available:** No
